# Supplementary material for: A Gorilla Adenovirus-Based Vaccine against Zika Virus Induces Durable Immunity and Confers Protection in Pregnancy
Source: PubMed Central journal article supplement — Cell Rep. Author manuscript; Available in PMC 2019 Sep 18. (PMC6750284; doi:10.1016/j.celrep.2019.08.005), 2019-09-03
Supplement: NIHMS1539134-supplement-1.pdf [file NIHMS1539134-supplement-1.pdf]

**Cell Reports, Volume 28**

**Supplemental Information**

**A Gorilla Adenovirus-Based Vaccine  
against Zika Virus Induces Durable Immunity  
and Confers Protection in Pregnancy**

**Ahmed O. Hassan, Igor P. Dmitriev, Elena A. Kashentseva, Haiyan Zhao, Douglas E. Brough, Daved H. Fremont, David T. Curiel, and Michael S. Diamond**

**Table S1. Evaluation of ZIKV vaccine platforms in mice, Related to all Figures**

| Vaccine platform                            | Vaccine Efficacy in mice |                                         |                                                | Reference                             |
|---------------------------------------------|--------------------------|-----------------------------------------|------------------------------------------------|---------------------------------------|
|                                             | # Doses                  | Neutralization titer                    | Protection against ZIKV challenge              |                                       |
| Gorilla adenovirus encoding prM-E (GAd-Zvp) | 1 or 2                   | FRNT EC <sub>50</sub><br>1,796 ± 919    | Yes<br>(No viremia or lethality)               | Yes<br>This study                     |
| Ad26.ZIKV.M-Env                             | 1                        | FRNT EC <sub>50</sub><br>~ 1,000        | Yes<br>(No viremia)                            | N.D.*<br>(Cox et al., 2018)           |
| Chimpanzee adenovirus type 7 (AdC7-M/E)     | 1                        | MN <sub>50</sub><br>~1,000              | Yes<br>(No viremia or lethality)               | N.D.<br>(Xu et al., 2018)             |
| mRNA encoding prM-E                         | 2                        | FRNT EC <sub>50</sub><br>10,000         | Yes<br>(No lethality)                          | Yes<br>(Richner et al., 2017a, 2017b) |
| DNA encoding prM-E                          | 1                        | MN <sub>50</sub><br>22                  | Yes<br>(No viremia)                            | N.D.<br>(Larocca et al., 2016)        |
| DNA encoding E                              | 1                        | NN <sub>50</sub><br><10                 | No<br>(viremia detected)                       | N.D.<br>(Larocca et al., 2016)        |
| Measles-vectored prM-Zika-sE                | 2                        | PRNT <sub>50</sub><br>40 - 1,280        | Yes<br>(Viremia and organ viral loads reduced) | Yes **<br>(Nürnberg et al., 2018)     |
| ZIKV-3'UTR-Δ10-LAV (live attenuated)        | 1                        | FRNT EC <sub>50</sub><br>18,900 ± 5,900 | Yes<br>(No lethality)                          | Yes<br>(Shan et al., 2017a, 2017b)    |
| DNA encoding prM-E                          | 1                        | PRNT <sub>50</sub><br>456 ± 5           | Yes<br>(No lethality)                          | N.D.<br>(Muthumani et al., 2016)      |

---

|                                  |   |                            |                     |      |                        |
|----------------------------------|---|----------------------------|---------------------|------|------------------------|
| DNA encoding prM-E               | 1 | RVP<br>~1000-100000        | ND                  | N.D. | (Dowd et al., 2016)    |
| Purified inactivated virus       | 1 | MN <sub>50</sub><br>15     | Yes<br>(No viremia) | N.D. | (Larocca et al., 2016) |
| hAd2-vecored<br>prM-E, prM-E-NS1 | 2 | MN <sub>50</sub><br>~1,000 | Yes***              | N.D. | (Liu et al., 2018)     |

---

\*N.D. = not determined; FRNT, focus reduction neutralization test; PRNT, plaque reduction neutralization test; MN, microneutralization test; RVP, reporter virus particles.

\*\* Reduced viremia and viral loads in fetuses and maternal tissues

\*\*\* Challenge in pups born to immunized dams showed reduced viral loads in brain and testis
